# Supplementary material
Source: PubMed Central journal article supplement (PMC9888273)
Supplement: aem.01951-22-s0001.pdf [file aem.01951-22-s0001.pdf]

## Supplementary Material

### Resuscitation-promoting factor accelerates enrichment of highly active PCE/PCB-dechlorinating cultures

**Running Title:** Rpf enhances anaerobic microbial dechlorination

Xiaomei Su<sup>a</sup>, Mengqi Xie<sup>a</sup>, Zhen Han<sup>a</sup>, Yeyuan Xiao<sup>b</sup>, Rui Wang<sup>a</sup>, Chaofeng Shen<sup>c</sup>,  
Muhammad Zaffar Hashmi<sup>d</sup>, Faqian Sun<sup>a,\*</sup>

<sup>a</sup> *College of Geography and Environmental Science, Zhejiang Normal University, Jinhua 321004, China*

<sup>b</sup> *Department of Civil and Environmental Engineering, Shantou University, Shantou 515063, China*

<sup>c</sup> *Department of Environmental Engineering, College of Environmental and Resource Sciences, Zhejiang University, Hangzhou, 310058, China*

<sup>d</sup> *Department of Chemistry, COMSATS University, Islamabad, 44000, Pakistan*

\*Corresponding author: Faqian Sun

Address: Yingbin Road 688#, Jinhua, 321004, China

E-mail: faqian@zju.edu.cn

Tel: +86-579-82282273

Fax: +86-579-82282273

**Table S1** PCE removal efficiencies ( $E_{3d}$ ) and simulation results with apparent first-order reaction kinetics ( $k$  and  $R^2$ ).

| Groups | Removal efficiencies (%) in day 3<br>( $E_{3d}$ ) | Kinetics simulation |       |
|--------|---------------------------------------------------|---------------------|-------|
|        |                                                   | $k$ ( $d^{-1}$ )    | $R^2$ |
| TG1    | $78.0 \pm 0.1$                                    | 0.428               | 0.943 |
| CG1    | $28.1 \pm 0.6$                                    | 0.111               | 0.971 |
| TG2    | $73.7 \pm 1.7$                                    | 0.431               | 0.961 |
| CG2    | $30.7 \pm 1.7$                                    | 0.134               | 0.909 |
| TG3    | $79.1 \pm 0.7$                                    | 0.729               | 0.918 |
| CG3    | $56.5 \pm 1.1$                                    | 0.135               | 0.926 |

**Table S2** Retention time, mass, peak intensity and concentration change of final dechlorination products of Aroclor 1260 in TG4 and CG4 after 50 days of incubation. The products were analyzed by gas chromatography-mass spectrometry (GC-MS) based on the standards of Aroclor 1260 and Aroclor 1242.

| Product (s)   | Retention time (min) | Number of chlorine | Mass of derivative | Peak intensity | Change in concentration after 50 d ( $\mu\text{M}$ ) |        |
|---------------|----------------------|--------------------|--------------------|----------------|------------------------------------------------------|--------|
|               |                      |                    |                    |                | TG4                                                  | CG4    |
| PCB 52        | 19.375               | 4                  | 291.92             | 33993          | 0.484                                                | 0.360  |
| PCB 49        | 20.676               | 4                  | 291.92             | 22161          | 1.632                                                | 0.556  |
| PCB 47        | 20.707               | 4                  | 291.92             | 23309          | 3.161                                                | 0.374  |
| PCB 64        | 23.659               | 4                  | 291.92             | 159578         | 1.836                                                | 0.409  |
| PCB 95        | 23.713               | 5                  | 325.88             | 18089          | 1.492                                                | 0.634  |
| PCB 99        | 24.894               | 5                  | 325.88             | 81178          | 1.820                                                | 0.973  |
| PCB 90/91/101 | 25.295               | 5                  | 325.88             | 26106          | 3.387                                                | 0.804  |
| PCB 110/118   | 27.889               | 5                  | 325.88             | 13291          | 1.140                                                | 0.231  |
| PCB 151       | 28.767               | 6                  | 359.84             | 20244          | -0.610                                               | -0.390 |
| PCB 135       | 29.088               | 6                  | 359.84             | 29632          | -0.406                                               | -0.355 |
| PCB 149       | 29.624               | 6                  | 359.84             | 18634          | -1.207                                               | -1.016 |
| PCB 146       | 30.936               | 6                  | 359.84             | 28955          | -1.363                                               | -1.062 |
| PCB 153       | 31.364               | 6                  | 359.84             | 31718          | -0.521                                               | -0.484 |
| PCB 141       | 32.277               | 6                  | 359.84             | 27318          | -0.347                                               | -0.271 |
| PCB 130       | 32.947               | 6                  | 359.84             | 52297          | -1.583                                               | -0.898 |
| PCB 138       | 33.353               | 6                  | 359.84             | 26312          | -0.215                                               | -0.314 |
| PCB 178       | 34.373               | 7                  | 393.80             | 17926          | -1.575                                               | -0.925 |
| PCB 187       | 34.580               | 7                  | 393.80             | 17073          | -0.992                                               | -0.976 |
| PCB 183/185   | 34.938               | 7                  | 393.80             | 18874          | -0.371                                               | -0.255 |
| PCB 174       | 36.264               | 7                  | 393.80             | 19114          | -0.898                                               | -0.702 |
| PCB 175       | 36.655               | 7                  | 393.80             | 21302          | -0.804                                               | -0.642 |
| PCB 172       | 37.785               | 7                  | 393.80             | 18026          | -0.255                                               | 0.000  |
| PCB 180       | 38.252               | 7                  | 393.80             | 185862         | -2.938                                               | -1.758 |
| PCB 156       | 38.558               | 6                  | 359.84             | 24574          | -0.269                                               | -0.199 |
| PCB 193       | 39.135               | 7                  | 393.80             | 19253          | -1.798                                               | -1.443 |
| PCB 170       | 40.370               | 7                  | 393.80             | 19284          | -1.134                                               | -0.750 |
| PCB 198       | 40.985               | 8                  | 429.76             | 14900          | -1.425                                               | -1.008 |
| PCB 199       | 41.368               | 8                  | 429.76             | 13333          | -0.688                                               | -0.868 |
| PCB 194       | 45.369               | 8                  | 429.76             | 10445          | -0.043                                               | -0.188 |
| PCB 206       | 48.964               | 9                  | 463.72             | 8479           | -0.392                                               | -0.339 |

**Table S3** Information and quality of Illumina high throughput sequencing data from PCE/PCB-fed cultures with and without Rpf amendment (TGs and CGs) at stage 1 (0.3 mM PCE), stage 2 (0.4 mM PCE), stage 3 (0.5 mM PCE) and stage 4 (26.88  $\mu$ M Aroclor 1260).

| <b>Sample</b> | <b>Raw reads</b> | <b>Clean reads</b> | <b>OTUs</b> | <b>*CleanQ20</b> | <b>*CleanQ30</b> |
|---------------|------------------|--------------------|-------------|------------------|------------------|
| <b>TG1-1</b>  | 44386            | 39036              | 1279        | 96.86            | 90.98            |
| <b>TG1-2</b>  | 79572            | 71090              | 2102        | 96.77            | 90.55            |
| <b>TG1-3</b>  | 107935           | 97633              | 1748        | 97.35            | 92.10            |
| <b>CG1-1</b>  | 143743           | 131264             | 2482        | 97.36            | 92.10            |
| <b>CG1-2</b>  | 170475           | 156872             | 2233        | 97.65            | 92.77            |
| <b>CG1-3</b>  | 30104            | 25919              | 1492        | 96.91            | 91.10            |
| <b>TG2-1</b>  | 126419           | 103077             | 1672        | 96.35            | 89.76            |
| <b>TG2-2</b>  | 56030            | 49288              | 1470        | 96.89            | 91.10            |
| <b>TG2-3</b>  | 87165            | 77000              | 1155        | 96.92            | 91.17            |
| <b>CG2-1</b>  | 80851            | 71458              | 1678        | 96.98            | 91.27            |
| <b>CG2-2</b>  | 426776           | 391727             | 2331        | 97.15            | 91.60            |
| <b>CG2-3</b>  | 65243            | 57731              | 1243        | 97.02            | 91.29            |
| <b>TG3-1</b>  | 104528           | 92465              | 829         | 96.64            | 90.33            |
| <b>TG3-2</b>  | 200344           | 173217             | 1085        | 96.86            | 91.07            |
| <b>TG3-3</b>  | 189482           | 173673             | 1097        | 97.14            | 91.62            |
| <b>CG3-1</b>  | 148401           | 136533             | 1055        | 97.28            | 91.93            |
| <b>CG3-2</b>  | 38588            | 34469              | 552         | 97.02            | 91.31            |
| <b>CG3-3</b>  | 101635           | 91304              | 729         | 96.73            | 90.52            |
| <b>TG4-1</b>  | 68253            | 60638              | 807         | 97.12            | 91.55            |
| <b>TG4-2</b>  | 200756           | 188543             | 658         | 97.36            | 91.97            |
| <b>TG4-3</b>  | 205768           | 193867             | 633         | 97.47            | 92.27            |
| <b>CG4-1</b>  | 110293           | 103988             | 595         | 97.52            | 92.28            |
| <b>CG4-2</b>  | 367005           | 339336             | 1113        | 97.06            | 91.03            |
| <b>CG4-3</b>  | 161820           | 152697             | 831         | 97.54            | 92.36            |

\*Clean Q20 or Q30: the percentage of bases with a phred value of >20 or 30.

**Table S4** Microbial alpha diversity in the PCE/PCB-fed cultures with and without Rpf amendment (TGs and CGs) at stage 1 (0.3 mM PCE), stage 2 (0.4 mM PCE), stage 3 (0.5 mM PCE) and stage 4 (26.88  $\mu$ M Aroclor 1260).

| <b>Sample</b> | <b>Chao1</b>         | <b>Dominance</b> | <b>Equitability</b> | <b>Richness</b>      | <b>Simpson</b>   | <b>Shannon_2</b> |
|---------------|----------------------|------------------|---------------------|----------------------|------------------|------------------|
| <b>TG1</b>    | 2322.75 $\pm$ 344.86 | 0.98 $\pm$ 0.01  | 0.71 $\pm$ 0.03     | 1925.00 $\pm$ 250.32 | 0.024 $\pm$ 0.00 | 7.74 $\pm$ 0.23  |
| <b>CG1</b>    | 2212.10 $\pm$ 565.83 | 0.99 $\pm$ 0.01  | 0.78 $\pm$ 0.06     | 1862.50 $\pm$ 523.97 | 0.010 $\pm$ 0.01 | 8.55 $\pm$ 1.04  |
| <b>TG2</b>    | 1930.10 $\pm$ 136.47 | 0.97 $\pm$ 0.01  | 0.65 $\pm$ 0.05     | 1571.00 $\pm$ 142.83 | 0.026 $\pm$ 0.01 | 6.92 $\pm$ 0.42  |
| <b>CG2</b>    | 1774.30 $\pm$ 290.62 | 0.92 $\pm$ 0.05  | 0.58 $\pm$ 0.07     | 1460.50 $\pm$ 307.59 | 0.079 $\pm$ 0.05 | 6.07 $\pm$ 0.93  |
| <b>TG3</b>    | 1473.05 $\pm$ 157.76 | 0.95 $\pm$ 0.01  | 0.55 $\pm$ 0.02     | 1091.00 $\pm$ 8.49   | 0.044 $\pm$ 0.01 | 5.58 $\pm$ 0.24  |
| <b>CG3</b>    | 906.20 $\pm$ 103.66  | 0.92 $\pm$ 0.00  | 0.54 $\pm$ 0.26     | 640.50 $\pm$ 125.16  | 0.081 $\pm$ 0.00 | 5.02 $\pm$ 0.85  |
| <b>TG4</b>    | 998.67 $\pm$ 82.47   | 0.70 $\pm$ 0.19  | 0.36 $\pm$ 0.14     | 699.33 $\pm$ 94.08   | 0.29 $\pm$ 0.19  | 3.46 $\pm$ 1.37  |
| <b>CG4</b>    | 1004.45 $\pm$ 139.51 | 0.56 $\pm$ 0.03  | 0.29 $\pm$ 0.00     | 713.00 $\pm$ 166.88  | 0.44 $\pm$ 0.25  | 2.73 $\pm$ 0.14  |

**Table S5** Literature reports on the chlorine atoms and removal rate of biphenyl in the final product of Aroclor 1260 dechlorination culture.

| Cultures                            | Concentration of Aroclor 1260 ( $\mu\text{M}$ ) | Incubation time (day) | Dechlorination rate ( $\mu\text{M}/\text{d}$ ) | Cl/ biphenyl | Reference  |
|-------------------------------------|-------------------------------------------------|-----------------------|------------------------------------------------|--------------|------------|
| TG4                                 | 26.88                                           | 50                    | 1.15                                           | 4.24         | This study |
| CG4                                 | 26.88                                           | 50                    | 0.76                                           | 4.96         | This study |
| Sediment microcosm                  | 53.80                                           | 120                   | -                                              | 6.19         | (1)        |
| WAS                                 | 26.88                                           | 180                   | -                                              | 6.06         | (2)        |
| DS                                  | 26.88                                           | 180                   | -                                              | 6.26         | (2)        |
| DEH10                               | 134.4                                           | 400                   | -                                              | 5.3          | (3)        |
| DF-1                                | 3.49                                            | 120                   | -                                              | 4.1          | (4)        |
| BH                                  | 268.8                                           | 100                   | -                                              | 6.3          | (5)        |
| BH+SF1+<br>DEH10                    | 268.8                                           | 100                   | -                                              | 5.6          | (5)        |
| BH+ <i>o</i> -17+DF-1               | 268.8                                           | 100                   | -                                              | 6.1          | (5)        |
| BH+SF1+DEH1<br>0+ <i>o</i> -17+DF-1 | 268.8                                           | 100                   | -                                              | 5.5          | (5)        |
| AD14-PCE                            | 80.65                                           | 210                   | 0.20                                           | 5.87         | (6)        |
| PE                                  | 67.2                                            | 32                    |                                                | 6.04         | (7)        |
| PP                                  | 67.2                                            | 32                    |                                                | 6.03         | (7)        |
| PS                                  | 67.2                                            | 32                    |                                                | 5.96         | (7)        |

**Table S6** Basic chemical properties of the soil collected from the PCB-contaminated site.

| Parameters                     | Soil sample      | Parameters             | Soil sample        |
|--------------------------------|------------------|------------------------|--------------------|
| Total PCBs ( $\mu\text{g/g}$ ) | $78.64 \pm 4.78$ | OrgC ( $\text{g/kg}$ ) | $37.53 \pm 2.13$   |
| Di-CBs ( $\mu\text{g/g}$ )     | $1.37 \pm 0.83$  | TN ( $\text{g/kg}$ )   | $1.08 \pm 0.08$    |
| Tri-CBs ( $\mu\text{g/g}$ )    | $21.92 \pm 0.48$ | TP ( $\text{g/kg}$ )   | $2.45 \pm 0.35$    |
| Tetra-CBs ( $\mu\text{g/g}$ )  | $8.77 \pm 0.83$  | Cu ( $\text{mg/kg}$ )  | $368.91 \pm 36.79$ |
| Penta-CBs ( $\mu\text{g/g}$ )  | $28.57 \pm 1.99$ | Pb ( $\text{mg/kg}$ )  | $281.27 \pm 56.25$ |
| Hexa-CBs ( $\mu\text{g/g}$ )   | $15.7 \pm 0.65$  | Zn ( $\text{mg/kg}$ )  | $387.20 \pm 25.93$ |
| Hepta-CBs ( $\mu\text{g/g}$ )  | $2.31 \pm 0.20$  | Cd ( $\text{mg/kg}$ )  | $33.40 \pm 1.90$   |
| pH                             | $6.84 \pm 0.07$  | Ni ( $\text{mg/kg}$ )  | $77.45 \pm 2.69$   |

**Table S7.** Mineral salts medium compositions used in this study.

| Reagents                                            | Amount (1L) |
|-----------------------------------------------------|-------------|
|                                                     | Unit (g)    |
| <b>Trace elements solution A</b>                    |             |
| FeCl <sub>2</sub> ·4H <sub>2</sub> O                | 1.5         |
| CoCl <sub>2</sub> ·6H <sub>2</sub> O                | 0.19        |
| MnCl <sub>2</sub> ·4H <sub>2</sub> O                | 0.1         |
| ZnCl <sub>2</sub>                                   | 0.07        |
| H <sub>3</sub> BO <sub>3</sub>                      | 0.006       |
| Na <sub>2</sub> MoO <sub>4</sub> ·2H <sub>2</sub> O | 0.036       |
| NiCl <sub>2</sub> ·6H <sub>2</sub> O                | 0.024       |
| CuCl <sub>2</sub> ·2H <sub>2</sub> O                | 0.002       |
| <b>Trace elements solution B</b>                    |             |
| Na <sub>2</sub> SeO <sub>3</sub> ·5H <sub>2</sub> O | 0.03        |
| Na <sub>2</sub> WO <sub>4</sub> ·2H <sub>2</sub> O  | 0.08        |
| <b>Salt solution</b>                                |             |
| NaCl                                                | 1.0         |
| MgCl <sub>2</sub> ·6H <sub>2</sub> O                | 0.5         |
| KH <sub>2</sub> PO <sub>4</sub>                     | 0.2         |
| NH <sub>4</sub> Cl                                  | 0.3         |
| KCl                                                 | 0.3         |
| CaCl <sub>2</sub> ·2H <sub>2</sub> O                | 0.015       |
| <b>Vitamin solutions</b>                            |             |
| D-biotin                                            | 0.02        |
| Folic acid                                          | 0.02        |
| Pyridoxine hydrochloride                            | 0.1         |
| Riboflavin                                          | 0.05        |
| Thiamin hydrochloride                               | 0.05        |
| Nicotinic acid                                      | 0.05        |
| DL-calcium pantothenate                             | 0.05        |
| P-aminobenzoic acid                                 | 0.05        |
| Thioctic acid                                       | 0.05        |
| Vitamin B12                                         | 0.01        |
| 1, 4-naphthoquinone                                 | 0.04        |
| Nicotinamide                                        | 0.1         |
| Hemin                                               | 0.01        |
| <b>Others</b>                                       |             |
| Resazurin                                           | 0.001       |
| NaHCO <sub>3</sub>                                  | 2.52        |



**Table S8** PCB congeners assignment to main peaks in gas chromatography (GC) analysis of Aroclor 1260.

| Peak number        | PCB congeners | The number of chlorine | Position of substituent | Weight percent contribution (%) |
|--------------------|---------------|------------------------|-------------------------|---------------------------------|
| 1                  | PCB 52        | 4                      | 2,2',5,5'-              | 0.288                           |
| 2                  | PCB 70        | 4                      | 2,3',4',5-              | 0.211                           |
| 3                  | PCB 95        | 5                      | 2,2',3,5',6-            | 1.803                           |
| 4                  | PCB 92        | 5                      | 2,2',3,5,5'-            | 0.441                           |
| 5                  | PCB 90        | 5                      | 2,2',3,4',5-            | 2.493                           |
|                    | PCB 101       | 5                      | 2,2',4,5,5'-            |                                 |
| 6                  | PCB 87        | 5                      | 2,2',3,4,5'-            | 0.806                           |
| 7                  | PCB 135       | 6                      | 2,2',3,3',6,6'-         | 1.227                           |
| 8                  | PCB 110       | 5                      | 2,3,3',4',6-            | 1.669                           |
| 9                  | PCB 151       | 6                      | 2,2',3,5,5',6-          | 2.934                           |
| 10                 | PCB 144       | 6                      | 2,2',3,4,5',6-          | 1.803                           |
| 11                 | PCB 123       | 5                      | 2,3',4,4',5'-           | 5.217                           |
|                    | PCB 149       | 6                      | 2,2',3,4',5',6-         |                                 |
| 12                 | PCB 118       | 5                      | 2,3',4,4',5-            | 0.499                           |
| 13                 | PCB 114       | 5                      | 2,3,4,4',5-             | 0.115                           |
| 14                 | PCB 146       | 6                      | 2,2',3,4',5,5'-         | 1.285                           |
| 15                 | PCB 153       | 6                      | 2,2',4,4',5,5'-         | 5.946                           |
| 16                 | PCB 105       | 5                      | 2,3,3',4,4'-            | 2.551                           |
|                    | PCB 130       | 6                      | 2,2',3,3',4,6'-         |                                 |
| 17                 | PCB 141       | 6                      | 2,2',3,4,5,5'-          | 3.241                           |
| 18                 | PCB 179       | 7                      | 2,2',3,3',5,6,6'-       | 2.110                           |
| 19                 | PCB 176       | 7                      | 2,2',3,3',4,6,6'-       | 1.132                           |
| 20                 | PCB 138       | 6                      | 2,2',3,4,4',5'-         | 6.310                           |
|                    | PCB 163       | 6                      | 2,3,3',4',5,6-          |                                 |
|                    | PCB 164       | 6                      | 2,3,3',4',5',6-         |                                 |
| 21                 | PCB 158       | 6                      | 2,3,3',4,4',6-          | 1.323                           |
| 22                 | PCB 126       | 5                      | 3,3',4,4',5-            | 1.362                           |
| 23                 | PCB 178       | 7                      | 2,2',3,3',5,5',6-       | 0.422                           |
| 24                 | PCB 187       | 7                      | 2,2',3,4',5,5',6-       | 4.910                           |
| 25                 | PCB 183       | 7                      | 2,2',3,4,4',5',6-       | 3.088                           |
| 26                 | PCB 128       | 6                      | 2,2',3,3',4,4'-         | 0.940                           |
| 27                 | PCB 185       | 7                      | 2,2',3,4,5,5',6-        | 1.343                           |
| 28                 | PCB 174       | 7                      | 2,2',3,3',4,5,6'-       | 5.044                           |
| 29                 | PCB 177       | 7                      | 2,2',3,3',4,5',6'-      | 2.915                           |
| 30                 | PCB 171       | 7                      | 2,2',3,3',4,4',6-       | 2.014                           |
| 31                 | PCB 201       | 8                      | 2,2',3,3',4,5',6,6'-    | 0.690                           |
| 32                 | PCB 172       | 7                      | 2,2',3,3',4,5,5'-       | 1.266                           |
| 33                 | PCB 180       | 7                      | 2,2',3,4,4',5,5'-       | 9.762                           |
| 34                 | PCB 156       | 6                      | 2,3,3',4,4',5-          | 0.422                           |
| 35                 | PCB 193       | 7                      | 2,3,3',4',5,5',6-       | 0.729                           |
| 36                 | PCB 200       | 8                      | 2,2',3,3',4,5,6,6'-     | 0.153                           |
| 37                 | PCB 170       | 7                      | 2,2',3,3',4,4',5-       | 5.025                           |
| 38                 | PCB 190       | 7                      | 2,3,3',4,4',5,6-        | 0.384                           |
| 39                 | PCB 198       | 8                      | 2,2',3,3',4,5,5',6-     | 3.165                           |
| 40                 | PCB 199       | 8                      | 2,2',3,3',4,5,5',6'-    | 3.414                           |
| 41                 | PCB 203       | 8                      | 2,2',3,4,4',5,5',6-     | 0.288                           |
| 42                 | PCB 195       | 8                      | 2,2',3,3',4,4',5,6-     | 1.688                           |
| 43                 | PCB 208       | 9                      | 2,2',3,3',4,5,5',6,6'-  | 0.192                           |
| 44                 | PCB 194       | 8                      | 2,2',3,3',4,4',5,5'-    | 3.126                           |
| 45                 | PCB 205       | 8                      | 2,3,3',4,4',5,5',6-     | 0.288                           |
| 46                 | PCB 206       | 9                      | 2,2',3,3',4,4',5,5',6-  | 0.882                           |
| Unidentified peaks | -             | -                      | -                       | 3.511                           |

“-” means not available in references.

**Table S9** PCB congeners assignment to main peaks in gas chromatography (GC) analysis of Aroclor 1242.

| Peak number        | PCB congeners | The number of chlorine | Position of substituent | Weight percent contribution (%) |
|--------------------|---------------|------------------------|-------------------------|---------------------------------|
| 1                  | PCB 4         | 2                      | 2,2'-                   | 1.719                           |
| 2                  | PCB 7         | 2                      | 2,4-                    | 1.023                           |
| 3                  | PCB 6         | 2                      | 2,3'-                   | 1.135                           |
| 4                  | PCB 8         | 2                      | 2,4'-                   | 3.765                           |
| 5                  | PCB 19        | 3                      | 2,2',6-                 | 0.734                           |
| 6                  | PCB 18        | 3                      | 2,2',5-                 | 5.338                           |
| 7                  | PCB 17        | 3                      | 2,2',4-                 | 2.854                           |
| 8                  | PCB 24        | 3                      | 2,3,6-                  | 3.809                           |
| 9                  | PCB 16        | 3                      | 2,2',3-                 | 1.124                           |
|                    | PCB 32        | 3                      | 2,4',6-                 |                                 |
| 10                 | PCB 26        | 3                      | 2,3',5-                 | 5.286                           |
| 11                 | PCB 25        | 3                      | 2,3',4-                 | 4.083                           |
| 12                 | PCB 31        | 3                      | 2,4',5-                 | 5.107                           |
| 13                 | PCB 28        | 3                      | 2,4,4'-                 | 12.905                          |
| 14                 | PCB 33        | 3                      | 2,3',4'-                | 5.567                           |
| 15                 | PCB 22        | 3                      | 2,3,4'-                 | 0.463                           |
| 16                 | PCB 45        | 4                      | 2,2',3,6-               | 3.301                           |
| 17                 | PCB 47        | 4                      | 2,2',3,6'-              | 1.458                           |
| 18                 | PCB 52        | 4                      | 2,2',5,5'-              | 0.462                           |
| 19                 | PCB 49        | 4                      | 2,2',4,5'-              | 3.665                           |
| 20                 | PCB 45        | 4                      | 2,2',3,6-               | 3.318                           |
|                    | PCB 46        | 4                      | 2,2',3,6'-              |                                 |
| 21                 | PCB 44        | 4                      | 2,2',3,5'-              | 3.184                           |
| 22                 | PCB 37        | 3                      | 3,4,4'-                 | 5.275                           |
|                    | PCB 42        | 3                      | 2,2',3,4'-              |                                 |
| 23                 | PCB 41        | 3                      | 2,2',3,4-               | 2.265                           |
|                    | PCB 64        | 4                      | 2,3,4',6-               |                                 |
| 24                 | PCB 40        | 4                      | 2,2',3,3'-              | 1.209                           |
| 25                 | PCB 100       | 5                      | 2,22,4,42,6-            | 1.739                           |
|                    | PCB 67        | 4                      | 2,3',4,5-               |                                 |
| 26                 | PCB 74        | 4                      | 2,4,4',5-               | 4.134                           |
| 27                 | PCB 70        | 4                      | 2,3',4',5-              | 1.94                            |
| 28                 | PCB 66        | 4                      | 2,3',4,4'-              | 1.674                           |
| 29                 | PCB 56        | 4                      | 2,3,3',4'-              | 2.532                           |
|                    | PCB 60        | 4                      | 2,3,4,4'-               |                                 |
| 30                 | PCB 101       | 5                      | 2,2',4,5,5'-            | 0.664                           |
| 31                 | PCB 99        | 5                      | 2,2',4,4',5-            | 0.594                           |
| 32                 | PCB 97        | 5                      | 2,2',3,4',5'-           | 1.492                           |
| 33                 | PCB 87        | 5                      | 2,2',3,4,5'-            | 0.755                           |
| 34                 | PCB 85        | 5                      | 2,2',3,4,4'-            | 0.704                           |
| 35                 | PCB 110       | 5                      | 2,3,3',4',6-            | 0.64                            |
| 36                 | PCB 82        | 5                      | 2,2',3,3', -            | 0.434                           |
| 37                 | PCB 118       | 5                      | 2,3',4,4',5-            | 0.463                           |
| 38                 | PCB 153       | 6                      | 2,2',4,4',5,5'-         | 0.938                           |
| Unidentified peaks | -             | -                      | -                       | 2.248                           |

“-” means not available in references.

**Table S10** The primer sets of real-time quantitative PCR used in this study

| Primers | Target                                  | Orientation | Sequence                   | Temperature | Reference |
|---------|-----------------------------------------|-------------|----------------------------|-------------|-----------|
| Eub338  | Bacterial 16S rRNA<br>gene              | Forward     | ACTCCTACGGGA<br>GGCAGCAG   | 58 °C       | (8)       |
| Eub518  | Bacterial 16S rRNA<br>gene              | Reverse     | ATTACCGCGGCT<br>GCTGG      | 58 °C       | (8)       |
| F515    | Archaeal 16S rRNA<br>gene               | Forward     | GTGCCAGCMGC<br>CGCGGTAA    | 57 °C       | (9)       |
| R806    | Archaeal 16S rRNA<br>gene               | Reverse     | GGACTACVSGGG<br>TATCTAAT   | 57 °C       | (9)       |
| DhcF    | <i>Dehalococcoides</i> 16S<br>rRNA gene | Forward     | GGTAATACGTAG<br>GAAGCAAGCG | 58 °C       | (6)       |
| DhcR    | <i>Dehalococcoides</i> 16S<br>rRNA gene | Reverse     | CCGGTTAAGCCG<br>GGAAATT    | 58 °C       | (6)       |

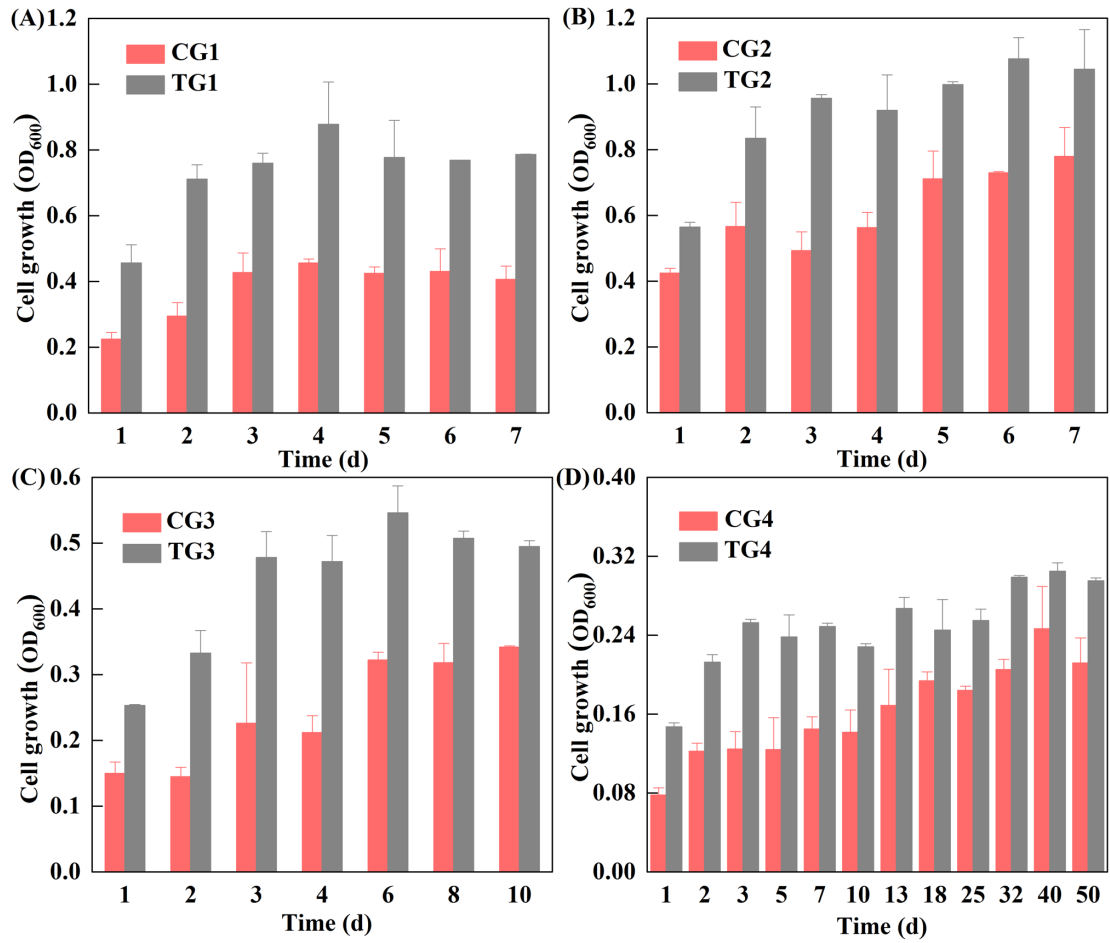

**Fig. S1** Cell growth of PCE/PCB-fed cultures with and without Rpf amendment (TGs and CGs) at stage 1 (A, 0.3 mM PCE), stage 2 (B, 0.4 mM PCE), stage 3 (C, 0.5 mM PCE) and stage 4 (D, 26.88 μM Aroclor 1260).

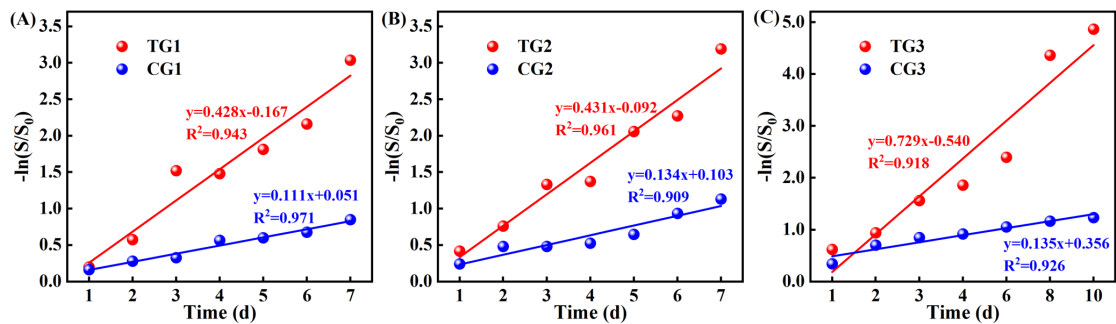

**Fig. S2** Pseudo-first-order kinetics for PCE dichlorination in PCE-fed cultures with and without Rpf amendment (TGs and CGs) at stage 1 (0.3 mM PCE, A), stage 2 (0.4 mM PCE, B), stage 3 (0.5 mM PCE, C).

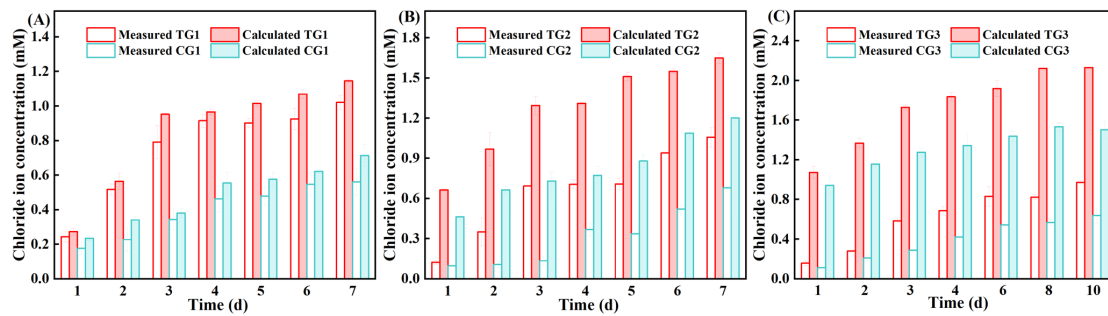

**Fig. S3** Chloride ion accumulation in PCE-fed cultures during PCE dechlorination at initial concentrations of 0.3 (A), 0.4 (B) and 0.5 mM (C). The chloride ion in cultures was analyzed by ion chromatography. Calculated values were obtained based on the PCE dechlorination shown in Fig. 2.

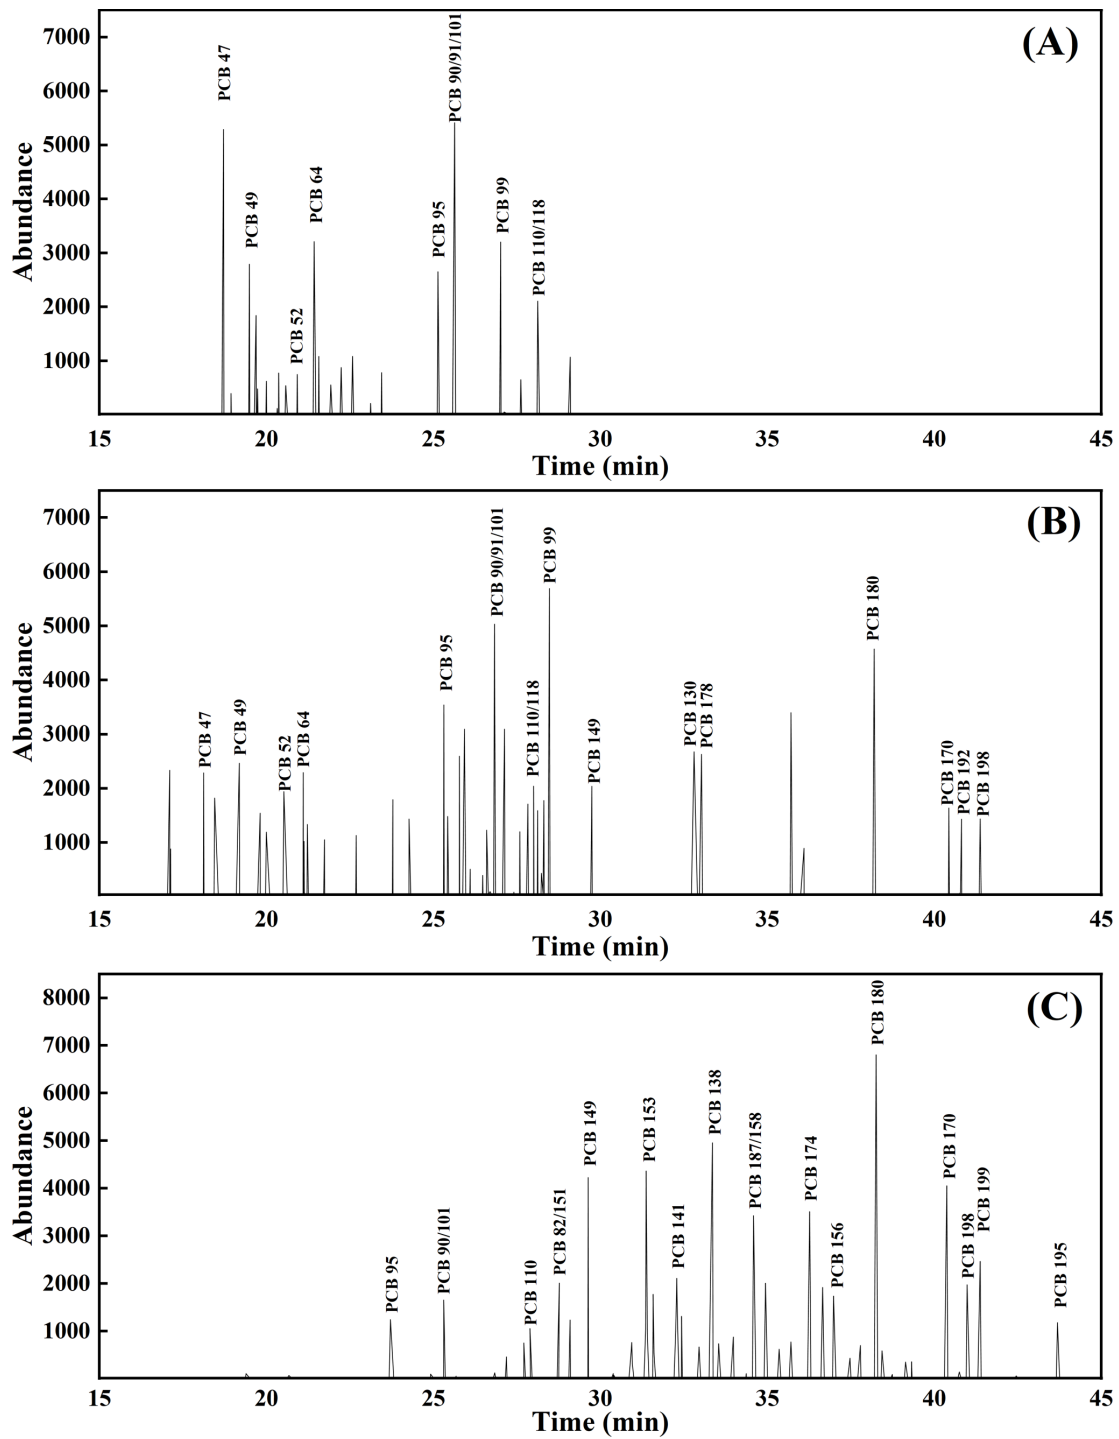

**Fig. S4** Aroclor 1260 dechlorination in PCB-fed cultures after 50 days of incubation. Dechlorination of Aroclor 1260 in TG4 (A), CG4 (B) and abiotic control (C) analysis by gas chromatography (GC).

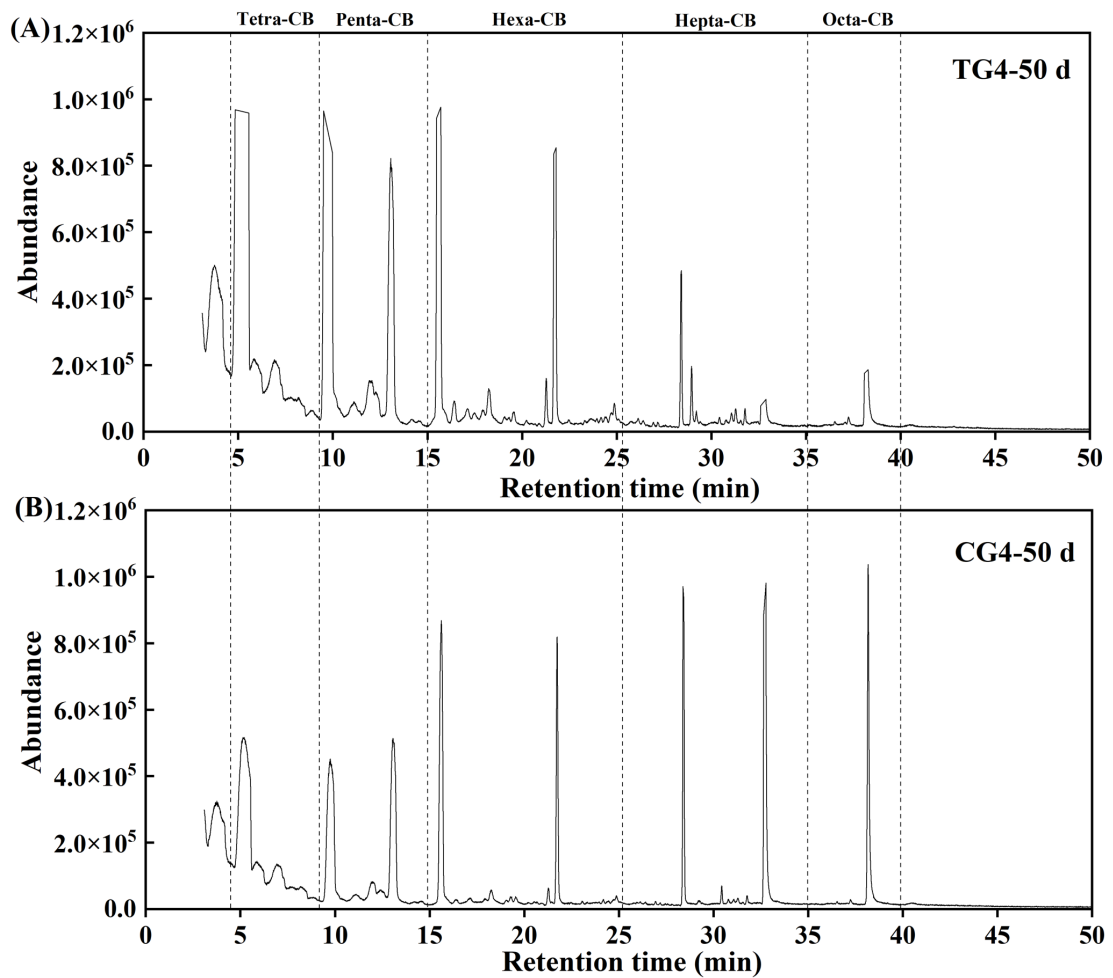

**Fig. S5** Gas chromatography-mass spectrometry (GC-MS) graphs of PCBs in PCB-fed cultures with and without Rpf amendment (TG4 and CG4) on days 50 of incubation (the abundance on the y-axis is  $1.0 \times 10^6$  for all samples).



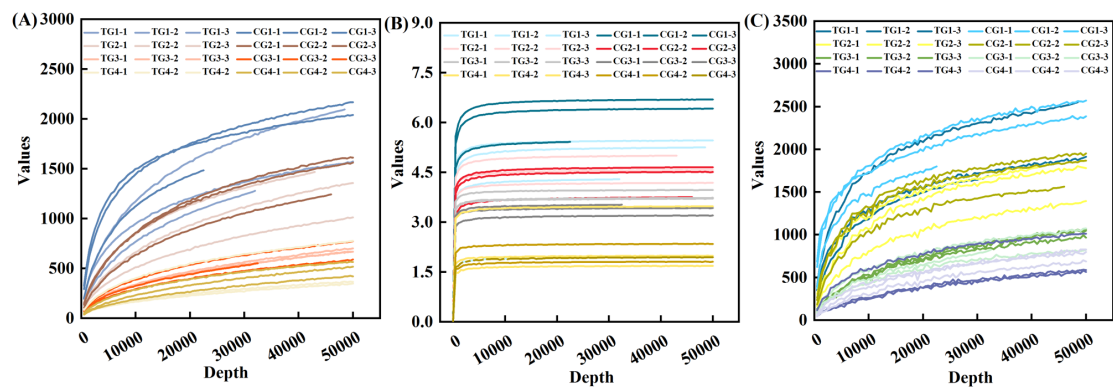

**Fig. S6** Rarefaction curves based on observed richness (A), Shannon diversity (B) and Chao1 diversity (C).

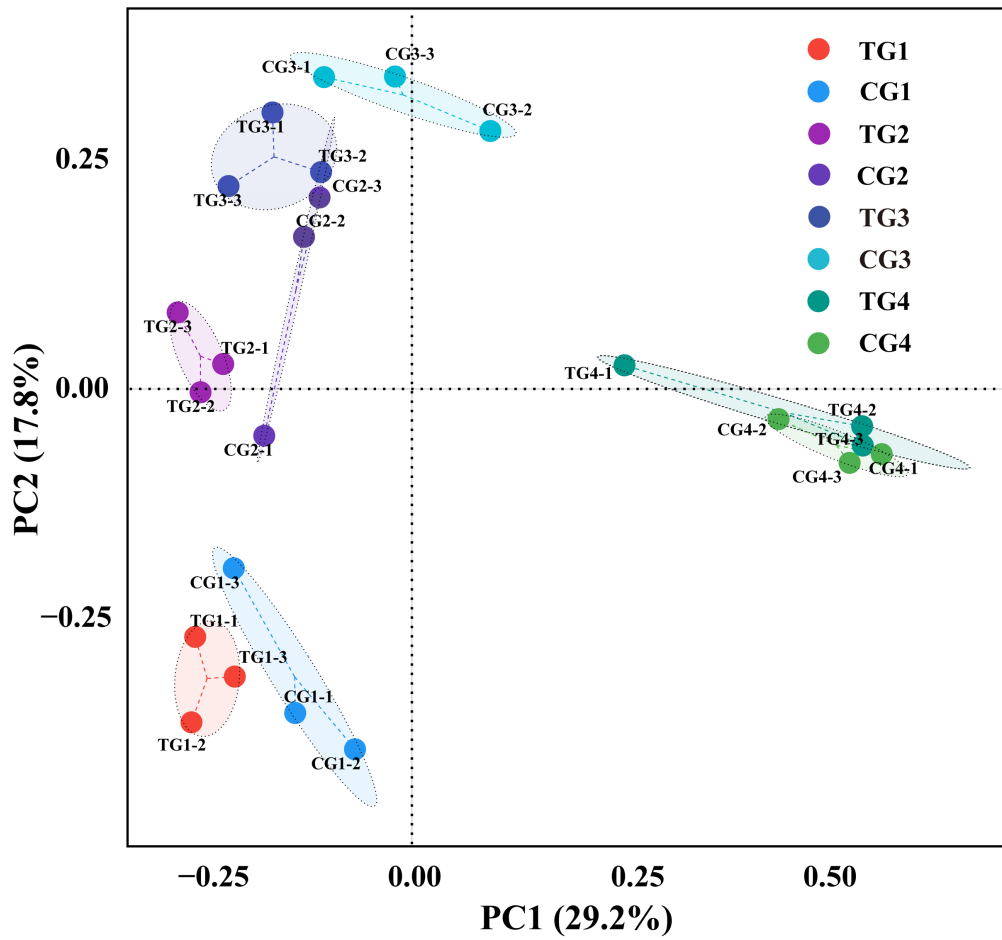

**Fig. S7** Principal co-ordinates analysis (PCoA) using Bray-Curtis for the microbial community detected in PCE/PCB-fed cultures with and without Rpf amendment (TGs and CGs) from stage 1 to stage 4.

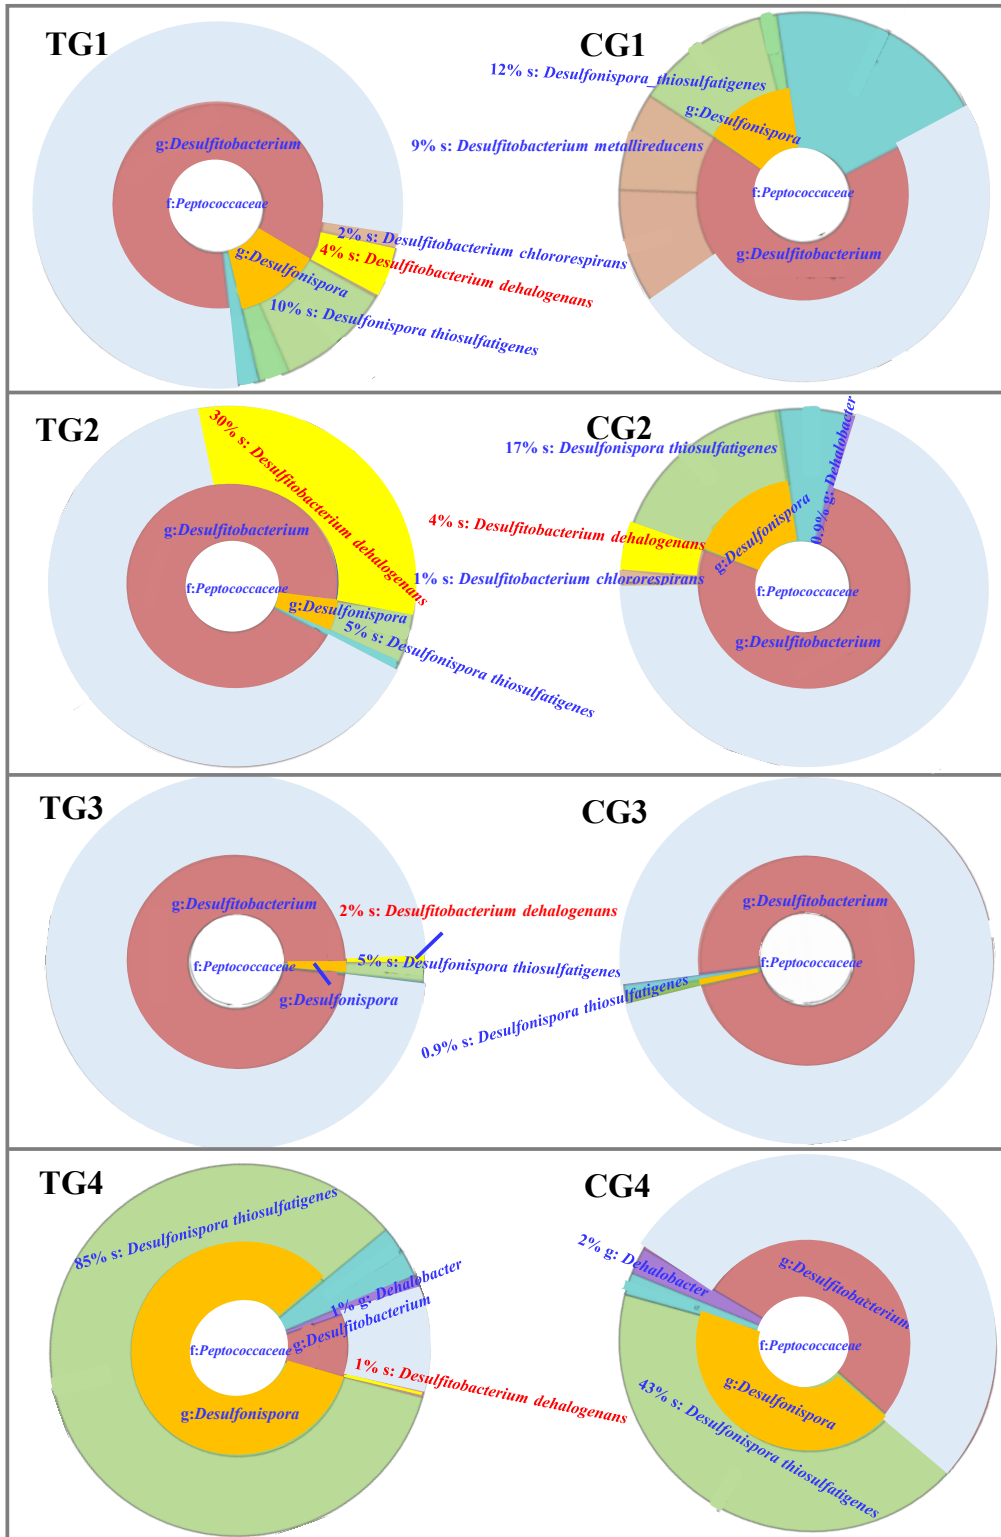

**Fig. S8** Krona chart showing the relative abundance and diversity of family *Peptococcaceae* in PCE/PCB-fed cultures with and without Rpf amendment (TGs and CGs) from stage 1 to stage 4. The relative abundance of *Desulfotobacterium dehalogenans* was highlight in Red.

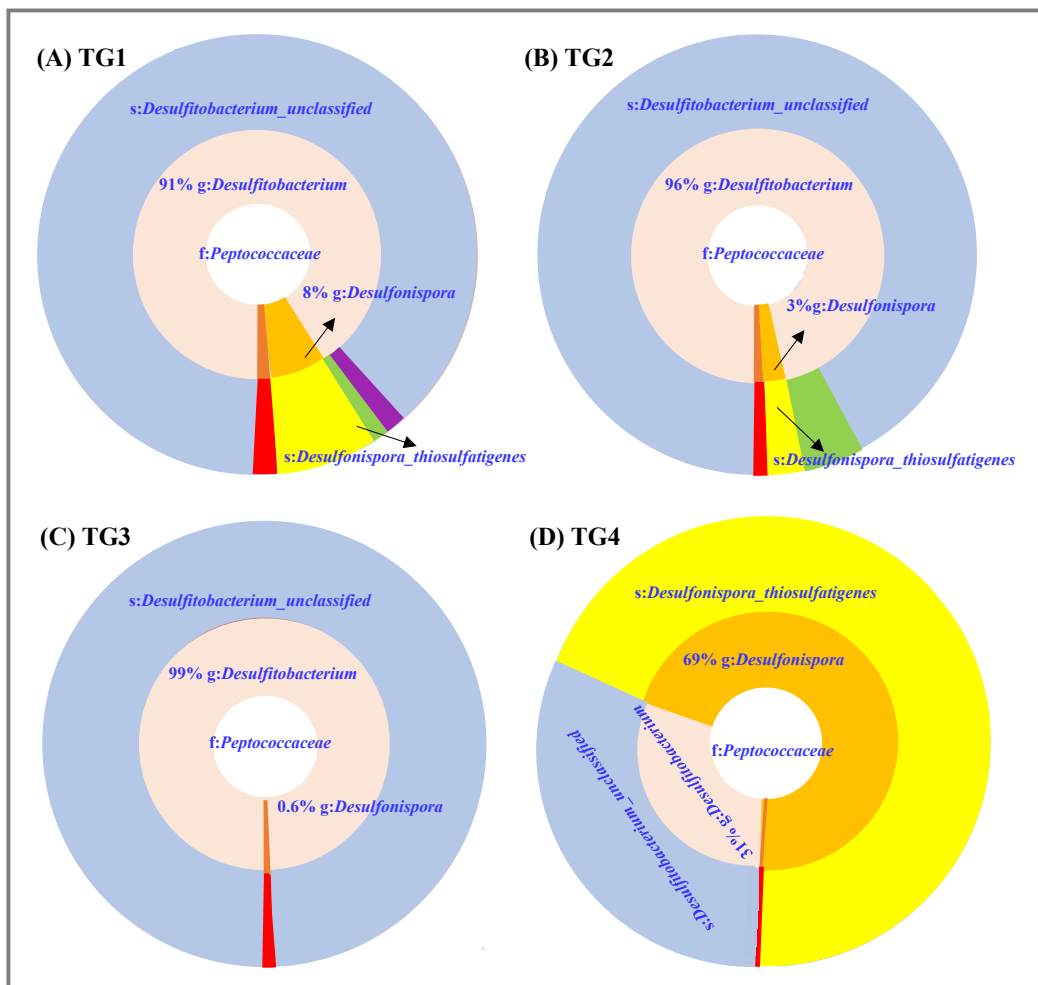

**Fig. S9** Krona chart showing the relative abundance and diversity of genera *Desulfitobacterium* and *Desulfonispora* in PCE/PCB-fed cultures with Rpf amendment (TGs) from stage 1 to stage 4.

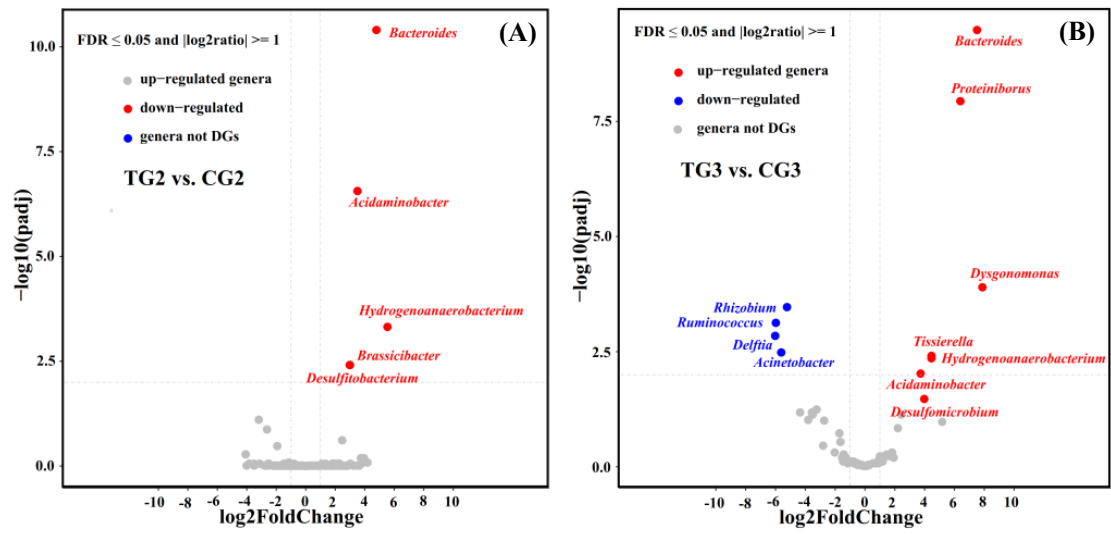

**Fig. S10** Different abundance level of genera in cultures with and without Rpf amendment (TGs and CGs) at stage 2 (A) and stage 3 (B).

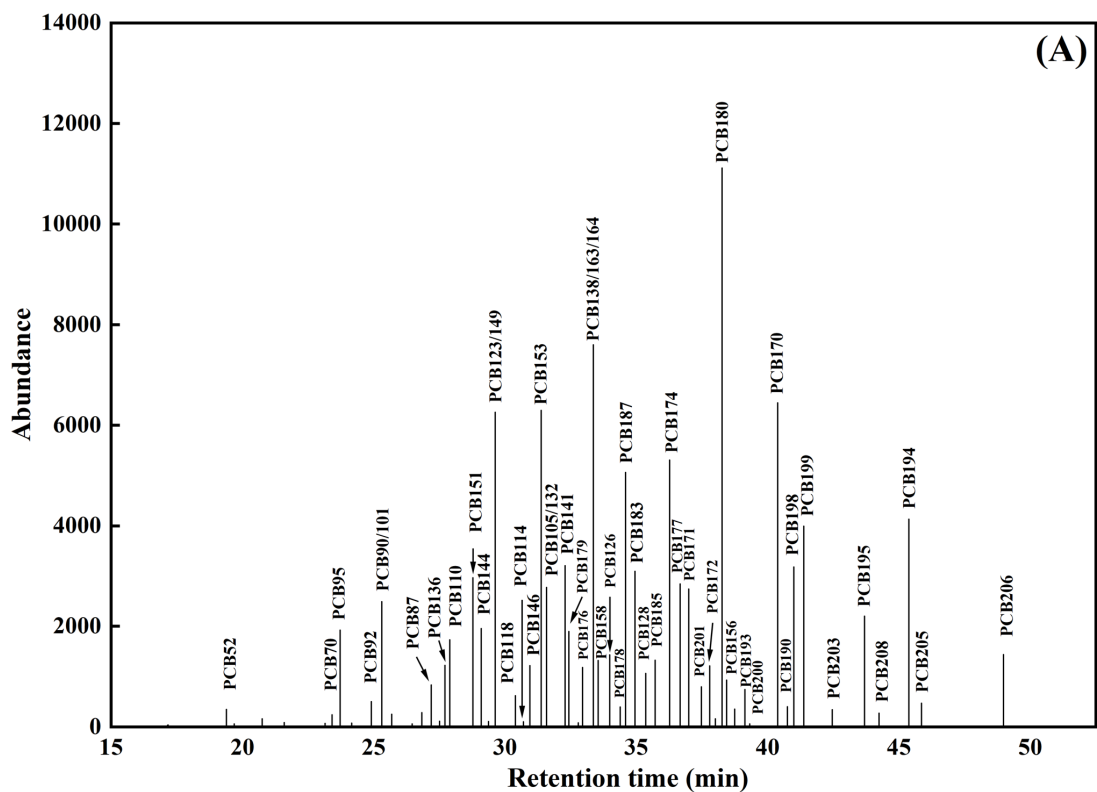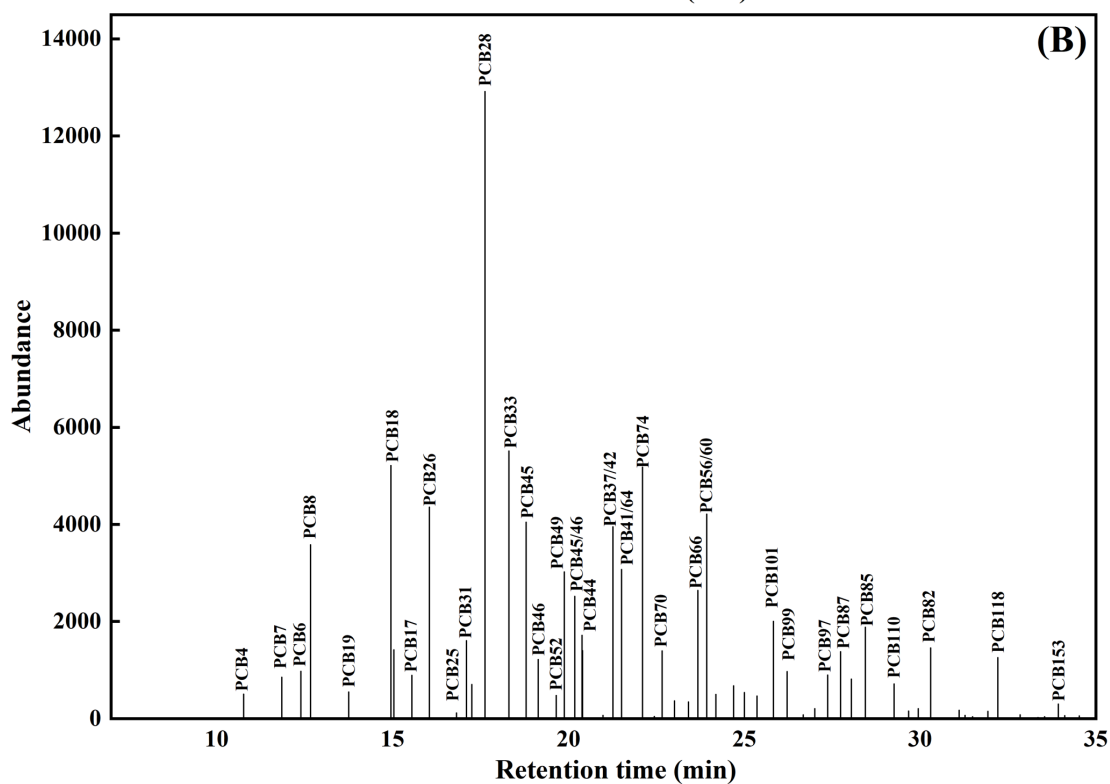

**Fig. S11** PCB congeners in the standards of Aroclor 1260 (A) and Aroclor 1242 (B) analysis by gas chromatography (GC). The congeners were also listed in Table S8 (Aroclor 1260) and Table S9 (Aroclor 1242).

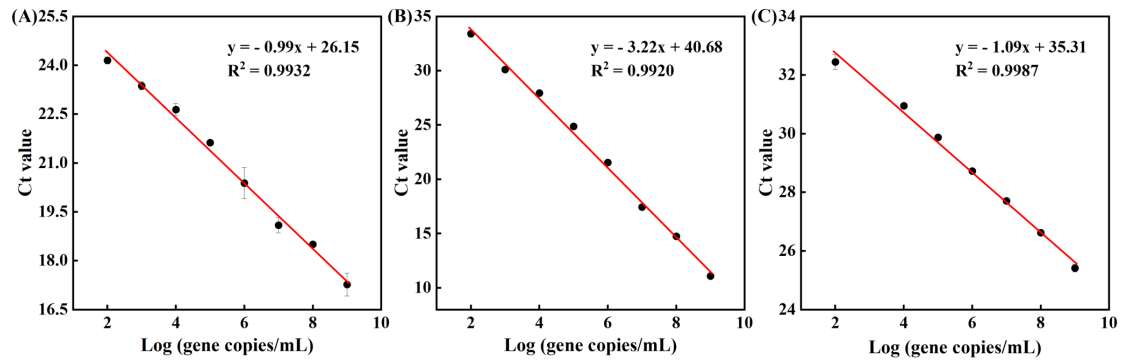

**Fig. S12** Standard curves for bacterial 16S rRNA gene (A), archaeal 16S rRNA gene (B) and *Dehalococcoides* 16S rRNA gene (C). Values are averages from three replicate experiments, and error bars represent standard deviations.

## Reference

1. Xu GF, Lu QH, Yu L, Wang SQ. 2019. Tetrachloroethene primes reductive dechlorination of polychlorinated biphenyls in a river sediment microcosm. *Water Res* 152:87-95.
2. Xu GF, Zhao XJ, Zhao SY, He JZ. 2021. Acceleration of polychlorinated biphenyls remediation in soil via sewage sludge amendment. *J Hazard Mater* 420:126630.
3. Fagervold SK, May HD, Sowers KR. 2007. Microbial reductive dechlorination of Aroclor 1260 in Baltimore harbor sediment microcosms is catalyzed by three phylotypes within the phylum *Chloroflexi*. *Appl Environ Microbiol* 73:3009-3018.
4. Payne RB, May HD, Sowers KR. 2011. Enhanced reductive dechlorination of polychlorinated biphenyl impacted sediment by bioaugmentation with a dehalorespiring bacterium. *Environ Sci Technol* 45:8772-8779.
5. Fagervold SK, Watts JEM, May HD, Sowers KR. 2011. Effects of bioaugmentation on indigenous PCB dechlorinating activity in sediment microcosms. *Water Res* 45:3899-3907.
6. Wang SQ, He JZ. 2013. Dechlorination of commercial PCBs and other multiple halogenated compounds by a sediment-free culture containing *Dehalococcoides* and *Dehalobacter*. *Environ Sci Technol* 47:10526-10534.
7. Li XK, Xu Q, Cheng YJ, Chen CL, Shen CF, Zhang CF, Zheng DQ, Zhang DD. 2022. Effect of microplastics on microbial dechlorination of a polychlorinated biphenyl mixture (Aroclor 1260). *Sci Total Environ* 831:154904.
8. Correa PA, Lin L, Just CL, Hu D, Hornbuckle KC, Schnoor JL, Van Aken B. 2010. The effects of individual PCB congeners on the soil bacterial community structure and the abundance of biphenyl dioxygenase genes. *Environ Int* 36:901-906.



9. Walters WA, Caporaso JG, Lauber CL, Berg-Lyons D, Fierer N, Knight R. 2011. PrimerProspector: de novo design and taxonomic analysis of barcoded polymerase chain reaction primers. *Bioinf* 27:1159-1161.
